# Supplementary figures and images for: Cobalt(ii)–(dpyo)–dicarboxylate networks: unique H-bonded assembly and rare bridging mode of dpyo in one of them [dpyo = 4,4′-dipyridyl N,N′-dioxide]
Source: Royal Society of Chemistry journal article supplement (doi:10.1039/b617278d), 2007-01-01

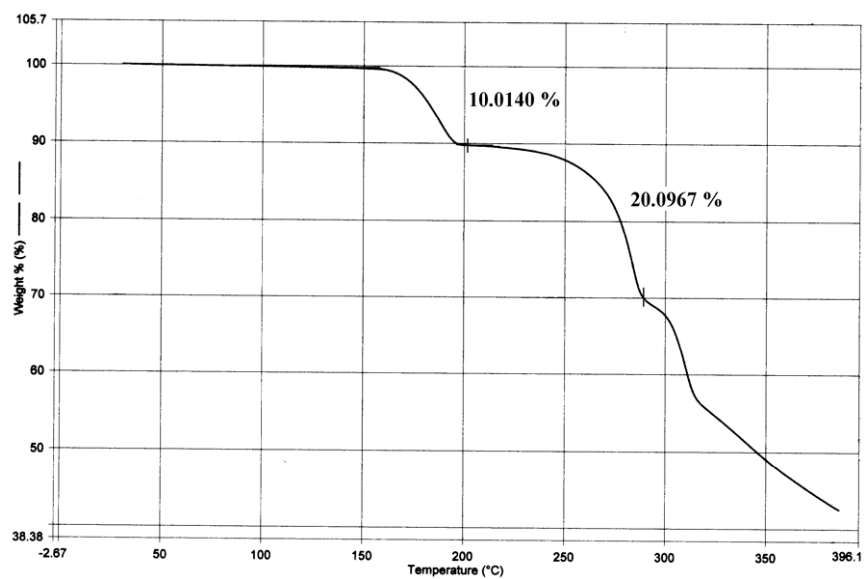

Fig. S1. TG curve of complex 2.

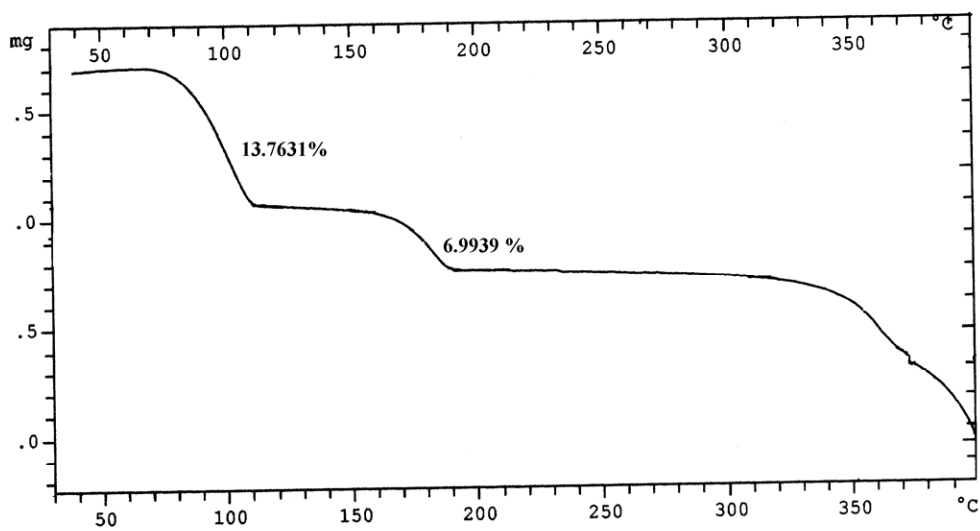

Fig. S2. TG curve of complex 3.

Supplement: b617278d.pdf [file b617278d.pdf]
